# Supplementary material for: Metformin Sensitizes Non-small Cell Lung Cancer Cells to an Epigallocatechin-3-Gallate (EGCG) Treatment by Suppressing the Nrf2/HO-1 Signaling Pathway
Source: PubMed Central journal article supplement — Int J Biol Sci. 2017 Nov 27;13(12):1560–9. doi: 10.7150/ijbs.18830 (PMC5723922; doi:10.7150/ijbs.18830), 2017-11-27
Supplement: ijbsv13p1560s1.pdf [file ijbsv13p1560s1.pdf]

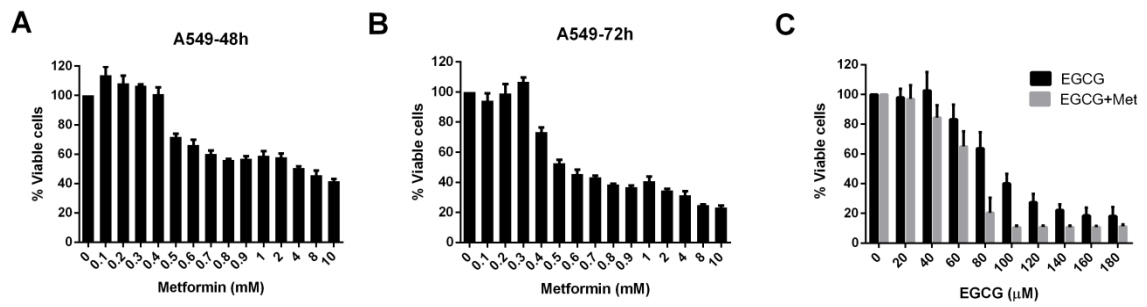

**Fig. S1. Effects of EGCG and metformin on the cell viability.**

(A and B) A549 cells were treated with the indicated concentration of metformin for the indicated times, and cell viability was subsequently measured using an MTT assay. (C) A549 cells were treated with the indicated concentrations of metformin for 48 h and then with EGCG for 24 h, and cell viability was subsequently measured using an MTT assay.

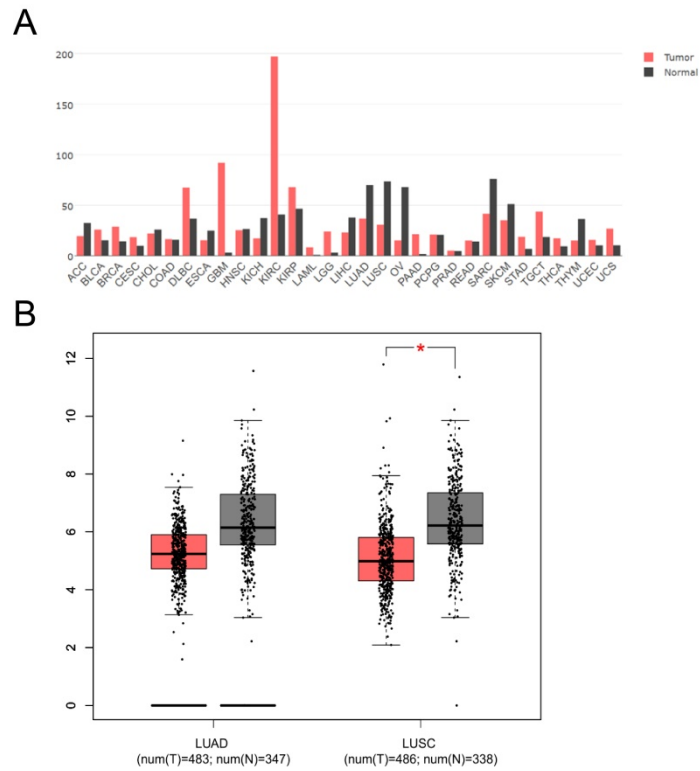

**Fig. S2. HO-1 mRNA levels in different cancers.**

(A) HO-1 mRNA levels in 30 cancers, according to the TCGA database. (B) Boxplot of HO-1 mRNA levels in lung adenocarcinoma (LUAD) and lung squamous cell carcinoma (LUSC) samples.

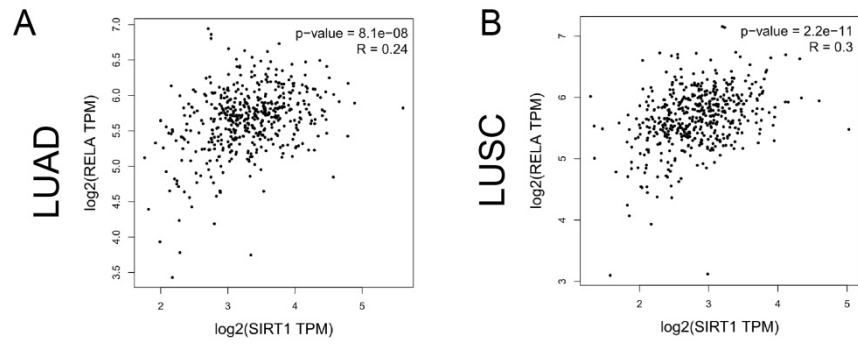

**Fig. S3. NF- $\kappa$ B expression correlates with *SIRT1* expression.**

NF- $\kappa$ B expression correlates with *SIRT1* expression in (A) lung adenocarcinoma (LUAD) and (B) lung squamous cell carcinoma (LUSC) samples, according to the TCGA database.
